# Supplementary material for: Cryptococcosis in Colombia: Compilation and Analysis of Data from Laboratory-Based Surveillance
Source: MDPI journal article supplement (doi:10.3390/jof4010032), 2018-03-01
Supplement: s1 [file s1]

**ENCUESTA EPIDEMIOLÓGICA SOBRE LA CRIPTOCOCOSIS EN COLOMBIA****Datos del paciente**Nombre y apellido (iniciales) \_\_\_\_\_ Sexo  M  F

Año de nacimiento \_\_\_\_\_ N° documento de identidad \_\_\_\_\_

Departamento de nacimiento \_\_\_\_\_ Departamento de residencia \_\_\_\_\_ Teléfono \_\_\_\_\_

| <b>Factores de riesgo</b> (marque con una X la opción que corresponda)<br>(cuando la respuesta es SI, por favor complete la información) |                                 | Si | No | No dato |
|------------------------------------------------------------------------------------------------------------------------------------------|---------------------------------|----|----|---------|
| 1. Infección por VIH                                                                                                                     | Número de células CD4+/mL _____ |    |    |         |
| 2. Uso de corticosteroides                                                                                                               |                                 |    |    |         |
| 3. Enfermedad autoinmune                                                                                                                 | ¿Cuál? _____                    |    |    |         |
| 4. Trasplante                                                                                                                            | Órgano trasplantado _____       |    |    |         |
| 5. Tumor sólido                                                                                                                          | Tipo de tumor _____             |    |    |         |
| 6. Malignidad hematológica                                                                                                               | Tipo de malignidad _____        |    |    |         |
| 7. Diabetes mellitus                                                                                                                     |                                 |    |    |         |
| 8. Cirrosis hepática                                                                                                                     |                                 |    |    |         |
| 9. Falla renal crónica                                                                                                                   |                                 |    |    |         |
| 10. Sarcoidosis                                                                                                                          |                                 |    |    |         |
| 11. Otro factor                                                                                                                          | ¿Cuál? _____                    |    |    |         |
| 12. Sin factor de riesgo aparente                                                                                                        |                                 |    |    |         |
| ¿Fue la criptococosis la enfermedad que definió el sida?                                                                                 |                                 |    |    |         |

**Diagnóstico de criptococosis**Fecha \_\_\_\_\_ Día \_\_\_\_\_ Mes \_\_\_\_\_ Año \_\_\_\_\_  Caso nuevo  Recaída

| <b>Prueba diagnóstica</b><br>(si se realizó la prueba, marque con una X el resultado, si no, marque no realizada)<br>(cuando la respuesta es SI, por favor complete la información) |                                 | Positiva | Negativa | No realizada |
|-------------------------------------------------------------------------------------------------------------------------------------------------------------------------------------|---------------------------------|----------|----------|--------------|
| 1. Tinta china en el LCR                                                                                                                                                            |                                 |          |          |              |
| 2. Antígeno capsular en el LCR                                                                                                                                                      | Título _____                    |          |          |              |
| 3. Antígeno capsular en suero                                                                                                                                                       | Título _____                    |          |          |              |
| 4. Cultivo para <i>Cryptococcus neoformans</i>                                                                                                                                      | ¿De qué muestra?                |          |          |              |
|                                                                                                                                                                                     | LCR                             |          |          |              |
|                                                                                                                                                                                     | Sangre                          |          |          |              |
|                                                                                                                                                                                     | Lavado broncoalveolar           |          |          |              |
|                                                                                                                                                                                     | Orina                           |          |          |              |
|                                                                                                                                                                                     | Piel                            |          |          |              |
|                                                                                                                                                                                     | Otro (especificar)              |          |          |              |
| 5. Estudio histopatológico                                                                                                                                                          | ¿De cuál órgano o tejido? _____ |          |          |              |

| <b>Imágenes diagnósticas</b> (marque con una X la opción que corresponda) |                        | Normal | Anormal | No dato |
|---------------------------------------------------------------------------|------------------------|--------|---------|---------|
| Radiografía del tórax                                                     |                        |        |         |         |
| ¿Resultado anormal?                                                       | Infiltrados alveolares |        |         |         |
|                                                                           | Cavitaciones           |        |         |         |
|                                                                           | Derrame pleural        |        |         |         |
|                                                                           | Calcificaciones        |        |         |         |
|                                                                           | Masa pulmonar          |        |         |         |
|                                                                           | Otra (especificar)     |        |         |         |

| Imágenes cerebrales diagnósticas (marque con una X la opción que corresponda) | Si | No | No dato |
|-------------------------------------------------------------------------------|----|----|---------|
| 1. TAC de cráneo                                                              |    |    |         |
| 2. Resonancia magnética (RM) de cerebro                                       |    |    |         |

| Resultados de los estudios de imágenes cerebrales (marque con una X la opción que corresponda) |     |    |  |                                                |     |    |
|------------------------------------------------------------------------------------------------|-----|----|--|------------------------------------------------|-----|----|
| Anormalidad                                                                                    | TAC | RM |  | Anormalidad                                    | TAC | RM |
| 1. Masa cerebral                                                                               |     |    |  | 4. Infarto                                     |     |    |
| 2. Cerebritis                                                                                  |     |    |  | 5. Atrofia cerebral                            |     |    |
| 3. Hidrocefalia                                                                                |     |    |  | 6. Dilatación de los espacios de Virchow-Robin |     |    |
| Otra (especificar):                                                                            |     |    |  |                                                |     |    |

| Manifestaciones clínicas (marque con una X la opción que corresponda) | Si | No | No dato |
|-----------------------------------------------------------------------|----|----|---------|
| 1. Cefalea                                                            |    |    |         |
| 2. Náuseas o vómito                                                   |    |    |         |
| 3. Fiebre (temperatura $\geq 38^{\circ}\text{C}$ )                    |    |    |         |
| 4. Confusión o cambios mentales                                       |    |    |         |
| 5. Tos (de 3 ó más días de evolución, con o sin expectoración)        |    |    |         |
| 6. Pérdida de visión                                                  |    |    |         |
| 7. Visión doble                                                       |    |    |         |
| <b>8. Signos neurológicos focales (especificar):</b>                  |    |    |         |
| a. Rigidez nuchal y signos meníngeos (Kernig y Brudzinski)            |    |    |         |
| b. Hidrocefalia comunicante                                           |    |    |         |
| c. Hidrocefalia obstructiva                                           |    |    |         |
| d. Hipertensión intra-cranéana sin hidrocefalia                       |    |    |         |
| Valor de la presión de apertura del LCR en mm: <input type="text"/>   |    |    |         |
| e. Convulsiones                                                       |    |    |         |
| f. Pérdida de peso                                                    |    |    |         |
| g. Otras (especificar)                                                |    |    |         |

| Clasificación de la criptococosis (marque con una X la opción que corresponda) |  |                                               |  |
|--------------------------------------------------------------------------------|--|-----------------------------------------------|--|
| B45.0 - J99.8 Criptococosis pulmonar                                           |  | B45.7 Criptococosis diseminada o generalizada |  |
| B45.1 - G05.2-G02.1. Criptococosis cerebral, meningitis, meningocerebral       |  | B45.8 Criptococosis especificada NCOP         |  |
| B45.2 - L99.8. Criptococosis cutánea o de la piel                              |  | B45.9 Criptococosis (infección)               |  |
| B45.3 - M90.2. Criptococosis de hueso u ósea                                   |  |                                               |  |

| Tratamiento para la criptococosis |              |    |    |            |    |    |        |    |    |
|-----------------------------------|--------------|----|----|------------|----|----|--------|----|----|
|                                   | Medicamentos |    |    | Dosis/ día |    |    | Tiempo |    |    |
| Inicial                           | 1.           | 2. | 3. | 1.         | 2. | 3. | 1.     | 2. | 3. |
| Mantenimiento                     | 1.           | 2. | 3. | 1.         | 2. | 3. | 1.     | 2. | 3. |
| Profilaxis 2°                     | 1.           | 2. | 3. | 1.         | 2. | 3. | 1.     | 2. | 3. |

**Resultado de la terapia (egreso) (marque con una X la opción que corresponda)**

Exito (vivo)  
 Falla     Recaída     Tiempo de recaída  
 Muerte     Tiempo de muerte (tiempo de muerte luego del diagnóstico).  
 **No dato**

**Otras terapias**

Anti-TB     Antiretroviral     Esteroides     Otra (¿cuál?)

**Profesional responsable de la información**

Nombre  Dirección

Teléfono  FAX  E-mail

Fecha de envío

Nota: favor enviar este formulario por correo electrónico a: Patricia Escandón [pescandon@ins.gov.co](mailto:pescandon@ins.gov.co) y [p\\_escand@yahoo.com](mailto:p_escand@yahoo.com) y el aislamiento (especificar de donde se recuperó) al laboratorio de Micología del Instituto Nacional de Salud, Avenida calle 26 #51-60, Bogotá, Colombia. Teléfono (1) 220 77 00 Ext 1421. **La información recolectada en esta encuesta tendrá un manejo de forma anónima y confidencial.**
