# Supplementary material for: Cryptococcosis in Colombia: Compilation and Analysis of Data from Laboratory-Based Surveillance
Source: MDPI journal article supplement (doi:10.3390/jof4010032), 2018-03-01
Supplement: s1 [file s1]

## **Colombian Cryptococcosis Study Group**

### ***Antioquia:***

Catalina deBedout, Angela Restrepo, Corporación para Investigaciones Biológicas  
Angela Tobón, Carlos Agudelo, Carlos Restrepo, Hospital La María  
Myrtha Arango, Universidad de Antioquia  
Dora Rivas, Luz Marina Melquizoz, Victoria García, Paula Agudelo, Hospital General de Medellín  
Ana María Restrepo, Clínica CES  
Maryan Vásquez, Magda Cárdenas, Mayiber Henao, Edna Vásquez, Clínica Saludcoop Medellín  
Carlos Agudelo, Alejandro Vélez, Carlos Ignacio Gómez, Sergio Jaramillo, Hospital Pablo Tobón  
Uribe

### ***Atlántico:*** María Clara Noguera, Universidad Metropolitana

Adriana Marín, Clínica General del Norte  
Samir Vilorio, Hospital Universidad del Norte.

### ***Bogotá:***

María Isabel Medina, Hospital Simón Bolívar  
Carlos Álvarez, Judy Andrea Puerta, Claudia Linares, Maritza Rojas, Hospital San Ignacio  
Gloria Inés Gallo, Hospital Santa Clara  
Claudia Clavijo, Clínica San Rafael  
Martha Isabel Garzón, Karen Melissa Ordoñez, Hospital El Tunal  
Claudia Clavijo, Clínica San Rafael  
Sandra Nuñez, Gloria Inés Gallo, LSP Bogotá  
Luz Mery Jiménez, Hospital La Victoria  
Andrea López Guachetá, Hospital Meissen  
Nubia Escobar, Claudia Pardo, Hospital de Kennedy  
Rossana Mejía, Clínica Nueva

### ***Caldas:***

Martha Cecilia Kogson, Gilberto Manjarres, Hospital Santa Sofía

### ***Cauca:*** Fabiola González, Universidad del Cauca

### ***Cesar:*** José Yesid Rodríguez, Soraya Morales

### ***Huila:***

Luis Fernando Duran, Hospital Universitario de Neiva

### ***Meta:***

Sandra Hurtado, Hospital Departamental de Villavicencio

### ***Norte de Santander:***

Yeni Peña, Hospital Universitario Erasmo Meoz

### ***Risaralda:***

Myriam Gómez, Berenice Isaza, Hospital San Jorge

### ***Valle:***

Claudia Rocío Castañeda, Mónica Recalde, Juan Diego Vélez, Juan Carlos Alvir, Álvaro Iván  
Muñoz, Fernando Rozo, Fundación Valle del Lili  
Nancy Villamarín, Johan Castrillón, María Inés Álvarez, Hospital Universitario del Valle
